# Supplementary material for: Intestinal α –glycosidase transcriptional responses during development and diet adjustment in altricial birds
Source: Oxford University Press journal article supplement (doi:10.1242/jeb.171827), 2018-01-01
Supplement: jeb171827supp.pdf [file jeb171827supp.pdf]

**Table S1.** Results of two-way ANOVAs to evaluate the effect of diet, age and their interaction on maltase activity and AG mRNA of ZEBF and HOSP, respectively.

| Measurement      |             |                     |           |          |                |
|------------------|-------------|---------------------|-----------|----------|----------------|
| Maltase activity |             |                     |           |          |                |
|                  | Species     |                     |           |          |                |
|                  | ZEBF (n=34) | Source of Variation | <i>df</i> | <i>F</i> | <i>P-value</i> |
|                  |             | Age                 | 3         | 10.88    | 0.0001         |
|                  |             | Diet                | 1         | 0.36     | 0.5564         |
|                  |             | Interaction         | 3         | 0.21     | 0.8923         |
|                  |             | Error               | 26        |          |                |
|                  |             | Total               | 33        |          |                |
|                  | HOSP (n=52) | Source of Variation | <i>df</i> | <i>F</i> | <i>P-value</i> |
|                  |             | Age                 | 4         | 26.91    | 0.0001         |
|                  |             | Diet                | 1         | 22.74    | 0.0001         |
|                  |             | Interaction         | 4         | 5.38     | 0.0014         |
|                  |             | Error               | 42        |          |                |
|                  |             | Total               | 51        |          |                |
| AG mRNA level    |             |                     |           |          |                |
|                  | Species     |                     |           |          |                |
|                  | ZEBF (n=35) | Source of Variation | <i>df</i> | <i>F</i> | <i>P-value</i> |
|                  |             | Age                 | 3         | 1.75     | 0.18           |
|                  |             | Diet                | 1         | 0.25     | 0.62           |
|                  |             | Interaction         | 3         | 1.37     | 0.27           |
|                  |             | Error               | 27        |          |                |
|                  |             | Total               | 34        |          |                |
|                  | HOSP (n=48) | Source of Variation | <i>df</i> | <i>F</i> | <i>P-value</i> |
|                  |             | Age                 | 4         | 5.36     | 0.0016         |
|                  |             | Diet                | 1         | 17.01    | 0.0002         |
|                  |             | Interaction         | 4         | 5.48     | 0.0014         |
|                  |             | Error               | 38        |          |                |
|                  |             | Total               | 47        |          |                |

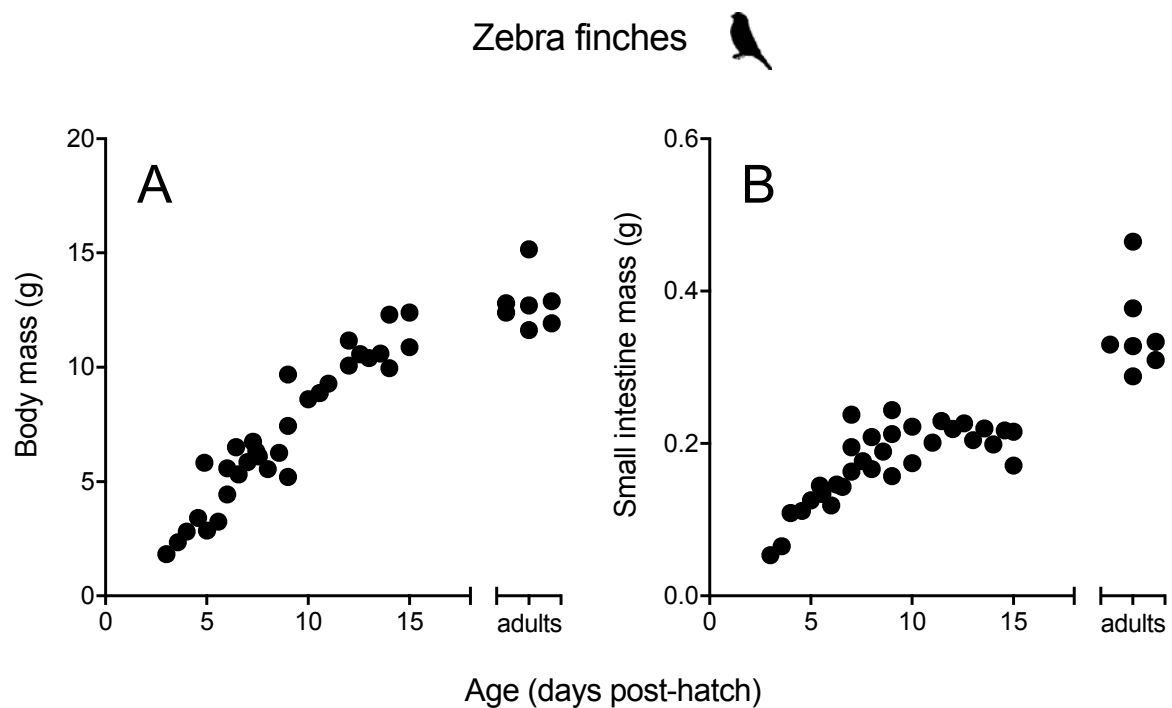

Fig. S1. Body mass (A) and small intestine mass (B) in zebra finch nestlings as a function of age (days post hatch) and as compared to adults. In this preliminary study, the birds received daily a mixture of seeds and bird food and fresh water *ad libitum*, and every other day a specially prepared egg food to support growth and reproduction. Each point is an individual bird.

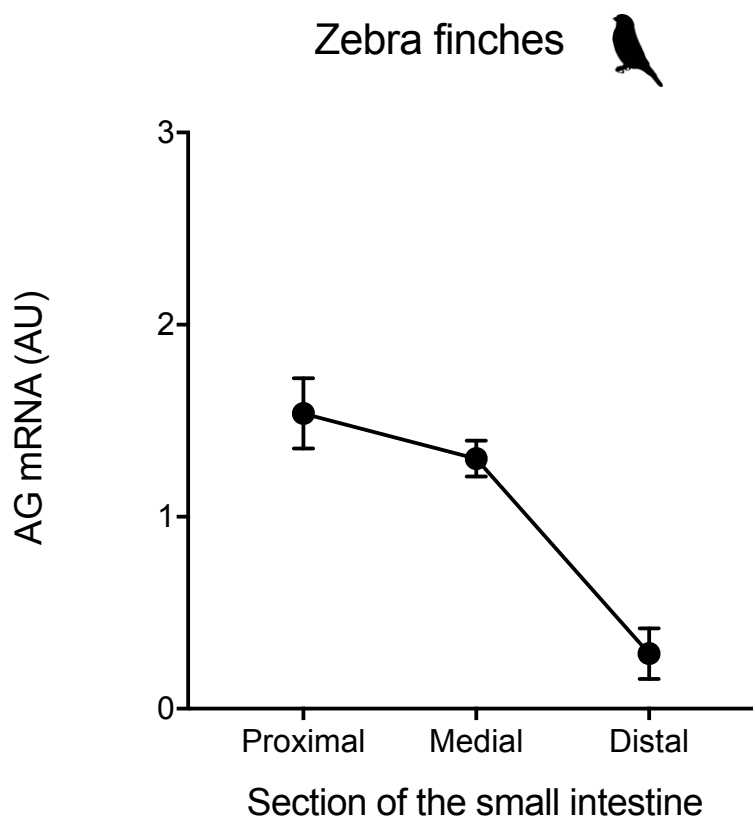

Fig. S2. Amount of intestinal AG mRNA as a function of intestinal position in adult Zebra finches. AG mRNA differed with intestinal position ( $F_{2,13,9}=22.49$ ,  $P<0.0001$ ) and was significantly lower in distal intestine ( $P<0.05$ ) than in either of the more proximal regions, which did not differ from each other ( $P=0.18$ ). Data for 11 birds eating either diets MS or HS were pooled because AG mRNA did not differ as a function of diet ( $P=0.17$ ).
